# Supplementary material for: Development and Validation of the Perceived Compassion Scale: A Reliable Tool for Assessing Patient-Centered Nursing Care
Source: Research Square preprint supplement (doi:10.21203/rs.3.rs-5551309/v1), 2025-05-06
Supplement: Supplementary file 1 [file 5a8e5cc6c621055dc0375c3e.docx]

|  | Factors and Items |  |  |
| --- | --- | --- | --- |
| 1. Factor:Compassionate Care | |  |  |
| 1 | She/He approaches me with love. |  |  |
| 2 | Answers my questions sincerely. |  |  |
| 3 | She/He speaks to me within earshot. |  |  |
| 4 | She/He listens carefully to understand me. |  |  |
| 5 | She/He treats me with respect. |  |  |
| 6 | She/He explains her practices to me in a way that I can understand. |  |  |
| 7 | I feel safe when I am around her/him. |  |  |
| 8 | She/He is compassionate. |  |  |
| 9 | She/He acts fairly. |  |  |
| 10 | She/He notices my suffering and makes an effort to alleviate it |  |  |
| 11 | She/He approaches me sincerely and genuinely |  |  |
| 12 | She/He treats me with honesty. |  |  |
| 13 | She/He gives me enough time. |  |  |
| 14 | She/He is accessible. |  |  |
| 2.Factor: Attentive Presence | | | |
| 15 | She/He addresses me by my name. |  |  |
| 16 | She/He doesn't reflect negative situations onto me |  |  |
| 17 | She/He makes eye contact while speaking. |  |  |
| 18 | She/He is there for me when I need it. |  |  |
| 19 | She/He makes me feel valued. |  |  |
